# Supplementary material for: Association of Morning Hypertension Subtype With Vascular Target Organ Damage and Central Hemodynamics
Source: PubMed Central journal article supplement — J Am Heart Assoc. 2017 Feb 14;6(2):e005424. doi: 10.1161/JAHA.116.005424 (PMC5523792; doi:10.1161/jaha.116.005424), 2017-02-14
Supplement: JAH3-6-e005424-s001.pdf [file JAH3-6-e005424-s001.pdf]

# **SUPPLEMENTAL MATERIAL**

**Table S1. Indices of the coronary artery calcium score according to morning hypertension subtypes**

|                     | Subtype I  | Subtype II | Subtype III | P value |
|---------------------|------------|------------|-------------|---------|
| CACS, AU            | 168±415    | 185±346    | 230±482     | 0.145   |
| Log CACS            | 1.11±1.13  | 1.24±1.18  | 1.37±1.15*  | 0.007   |
| CACS > 300AU, n(%)  | 102 (16.7) | 19 (21.3)  | 85 (19.8)   | 0.328   |
| CACS > 400AU, n(%)  | 82 (13.4)  | 14 (15.7)  | 71 (16.6)   | 0.369   |
| CACS > 1000AU, n(%) | 28 (4.6)   | 4 (4.5)    | 34 (7.9)    | 0.067   |

Data are presented as mean ± standard deviation or number (percentage).

\*p-value <0.05 in the *t*-test (subtype II or III vs. I), #p-value <0.05 in the *t*-test (subtype III vs. II)

CACS, coronary artery calcium score

**Table S2. Multivariate logistic regression analysis for central hypertension**

| <b>Model Y+ cfPWV</b>  | <b>OR (95% CI)</b>  | <b>p-value</b> |
|------------------------|---------------------|----------------|
| Brachial SBP, mmHg     | 1.097 (1.078–1.116) | < 0.001        |
| Heart rate, /min       | 0.966 (0.948–0.985) | < 0.001        |
| ACEI/ARB               | 1.726 (1.133–2.622) | 0.011          |
| Chronic kidney disease | 1.910 (1.039–3.510) | 0.037          |
| cfPWV, m/sec           | 1.216 (1.096–1.349) | < 0.001        |
| Subtype II vs. I       | 1.186 (0.622–2.260) | 0.605          |
| Subtype III vs. I      | 1.806 (1.133–2.881) | 0.013          |

Model Y as in Table 4

Central hypertension is defined as central SBP  $\geq$  130 mmHg or central DBP  $\geq$  90 mmHg.

SBP, systolic blood pressure; cfPWV, carotid to femoral PWV; ACEI/ARB, angiotensin converting enzyme inhibitor/angiotensin II receptor blocker

**Table S3. Multivariate logistic regression analysis for high-risk cfPWV (10 m/s) according to heart rate**

| <b>Heart rate &gt;65/min (Model Y + Day SBP)</b> | <b>OR (95% CI)</b>  | <b>p-value</b> |
|--------------------------------------------------|---------------------|----------------|
| Age, years old                                   | 1.095 (1.065–1.125) | < 0.001        |
| Brachial SBP, mmHg                               | 1.050 (1.031–1.070) | < 0.001        |
| Heart rate, /min                                 | 1.034 (1.005–1.063) | 0.020          |
| Diabetes                                         | 1.822 (1.040–3.194) | 0.036          |
| Subtype II vs. I                                 | 1.492 (0.634–3.511) | 0.359          |
| Subtype III vs. I                                | 1.920 (1.014–3.634) | 0.045          |
| <b>Heart rate ≤65/min (Model Y + Day SBP)</b>    | <b>OR (95% CI)</b>  | <b>p-value</b> |
| Age, years old                                   | 1.119 (1.076–1.164) | < 0.001        |
| Brachial SBP, mmHg                               | 1.040 (1.019–1.061) | < 0.001        |
| Heart rate, /min                                 | 1.100 (1.038–1.167) | 0.001          |
| Chronic kidney disease                           | 0.308 (0.110–0.860) | 0.025          |
| Beta blocker                                     | 2.732 (1.407–5.305) | 0.003          |
| Creatinine, mg/dL                                | 2.450 (1.061–5.657) | 0.036          |
| Subtype II vs. I                                 | 0.970 (0.357–2.634) | 0.953          |
| Subtype III vs. I                                | 1.032 (0.497–2.145) | 0.932          |

Model Y as in Table 4.

High-risk cfPWV is defined as aortic cfPWV > 10 m/s.

SBP, systolic blood pressure; cfPWV, carotid to femoral PWV

**Table S4. Multivariate logistic regression analysis for high-risk cfPWV (12 m/s)**

| <b>Model Y</b>     | <b>OR (95% CI)</b>  | <b>p-value</b> |
|--------------------|---------------------|----------------|
| Age, years old     | 1.104 (1.068–1.141) | < 0.001        |
| Brachial SBP, mmHg | 1.059 (1.041–1.077) | < 0.001        |
| Heart rate, /min   | 1.041 (1.018–1.065) | 0.001          |
| Diabetes           | 2.442 (1.360–4.386) | 0.003          |
| Glucose, mg/dL     | 1.011 (1.002–1.019) | 0.011          |
| Subtype II vs. I   | 0.826 (0.326–2.092) | 0.686          |
| Subtype III vs. I  | 1.863 (1.077–3.221) | 0.026          |

Model Y as in Table 4

SBP, systolic blood pressure; cfPWV, carotid to femoral PWV

**Table S5. Multivariate logistic regression analysis for vascular damage marker**

| <b>Model Y</b>    | <b>OR (95% CI)</b>  | <b>p-value</b> |
|-------------------|---------------------|----------------|
| CACS > 300AU      |                     |                |
| Subtype III vs. I | 0.947 (0.611–1.469) | 0.809          |
| ABI < 0.9         |                     |                |
| Subtype III vs. I | 2.250 (0.792–6.390) | 0.128          |
| baPWV > 1800cm/s  |                     |                |
| Subtype III vs. I | 1.044 (0.655–1.666) | 0.856          |

Model Y as in Table 4

CACS, coronary artery calcium score; baPWV, brachial to ankle PWV; ABI, ankle-brachial index
